# Supplementary material
Source: publisher figshare collection journal article supplement (https://sage.figshare.com/ndownloader/files/12580544)
Supplement: Supplementary file 1 [file 12580544]

**Supplemental Table 1: Female Patient Reproductive Status**

| **Female Patients** | **Overall (n=65)** | **Pre-Informatics (n=33)** | **Post-Informatics (n=32)** |
| --- | --- | --- | --- |
| **Child-Bearing Potential n (%)** | 19 (29.2) | 11 (33.3) | 8 (25.0) |
| **Non-Child Bearing Potential n (%)** | 46 (70.8) | 22 (66.7) | 24 (75.0) |
| Post-Menopause **n (%)** | 11 (23.9) | 3 (13.6) | 8 (33.3) |
| Hysterectomy **n (%)** | 10 (21.7) | 3 (15.8) | 7 (29.2) |
| Age >55 **n (%)** | 16 (34.8) | 16 (72.7) | 0 (0.0) |
| Provider Stated **n (%)** | 9 (19.6) | 0 (0) | 9 (37.5) |

**Supplemental Figure 1: Results including Female Patients ≤59 Years of Age as FCBP**
